1 **First genome-wide analysis of an endangered lichen reveals isolation by distance and**  
2 **strong population structure**

3 **Running Title:** Rock Gnome Population Genomics

4 **Keywords:** Conservation Genetics, Fungi, Population Genetics, Genomics

5 Jessica L. Allen<sup>\*,a</sup>, Sean K. McKenzie<sup>b</sup>, Robin S. Sleith<sup>a</sup>, and S. Elizabeth Alter<sup>c,d</sup>

6 <sup>a</sup>The New York Botanical Garden, 2900 Southern Blvd., Bronx, NY 10458

7 <sup>b</sup>Rockefeller University, 1230 York Avenue, New York, NY 10065

8 <sup>c</sup>York College, Biology Department, 94-20 Guy R Brewer Blvd, Jamaica, NY 11451

9 <sup>d</sup>The Graduate Center, City University of New York, 365 5th Avenue, New York NY 10016

10 \*corresponding author: [jallen@nybg.org](mailto:jallen@nybg.org), (509) 412-2071

11 **Author Contributions**

12 Jessica Allen designed this research project, applied for and acquired all required permits and  
13 funding for field work, conducted all field work and DNA extractions, analyzed data, and wrote  
14 the manuscript. Sean McKenzie assisted with portions of the field work, advised on sequencing  
15 techniques, and analyzed data. Robin Sleith advised on sequencing techniques and analyzed data.  
16 Elizabeth Alter advised on research project design, data analysis, and assisted in writing the  
17 manuscript.

18  
19 **Acknowledgements**

20 We would like to thank the following people for aiding with this research: Alex Cecil and Jenna  
21 Dorey for their field assistance, Gary Kauffman for help locating populations throughout the  
22 National Forest and many helpful discussions about *Gymnoderma*, Chris Ulrey for help locating  
23 the species on Blue Ridge National Park land, and especially for rappelling expertise, Dr. Richard  
24 Harris for conducting microscopy to search for trichogynes and spores. Library preparations and  
25 sequencing was conducted at The Rockefeller Genome Resource Center. Funding for this  
26 research came from Highlands Biological Station, NSF GRFP, and NSF DEB#1145511.

27  
28 **Data Accessibility** (To be deposited upon publication)

29 Reference genome: Genbank Accession XXXX

30 Raw reads: Sequence Read Archive XXXX

31

32 **First genome-wide analysis of an endangered lichen reveals isolation by distance and**  
33 **strong population structure**

34 **Abstract**

35 Lichenized fungi are evolutionarily diverse and ecologically important, but little is known  
36 about the processes driving diversification and genetic differentiation in these lineages. Though  
37 few studies have examined population genetic patterns in lichens, their geographic distributions  
38 are often assumed to be wholly shaped by ecological requirements rather than dispersal  
39 limitations. Furthermore, while their reproductive structures are observable, the lack of  
40 information about recombination mechanisms and rates can make inferences about reproductive  
41 strategies difficult. Here we investigate the population genomics of *Cetradonia linearis*, an  
42 endangered lichen narrowly endemic to the southern Appalachians of eastern North America, to  
43 test the relative contributions of environmental factors and geographic distance in shaping  
44 genetic structure, and to gain insights into the demography and reproductive biology of range  
45 restricted fungi. Analysis of genome-wide SNP data indicated strong evidence for both low rates  
46 of recombination and for strong isolation by distance, but did not support isolation by  
47 environment. Hindcast species distribution models and the spatial distribution of genetic  
48 diversity also suggested that *C. linearis* had a larger range during the last glacial maximum,  
49 especially in the southern portion of its current extent, consistent with previous findings in other  
50 southern Appalachian taxa. These results contribute to our understanding of intrinsic and  
51 extrinsic factors shaping genetic diversity and biogeographic patterns in *C. linearis*, and more  
52 broadly, in rare and endangered fungi.

53 **Keywords:** Conservation Genetics, Fungi, Population Genetics, Genomics

54

## 55 **Introduction**

56           Symbiotic fungi, including lichenized species, represent some of the most ecologically  
57 important radiations on earth. However, the processes shaping genetic differentiation and gene  
58 flow in these groups remain poorly understood. Historically, two major assumptions have shaped  
59 hypotheses about symbiotic fungal population structure and evolution. First, because most fungi  
60 produce very small spores, their distribution is thought to be limited primarily by ecological  
61 suitability rather than geographic distance (O'Malley 2007). Second, species in which no sexual  
62 reproductive structures have been observed are assumed to reproduce only asexually (Taylor et  
63 al. 2015). Phylogenetic and population genetic studies have already challenged these  
64 assumptions in fungi that do not form lichens. For instance, in the common and widespread  
65 fungus *Suillus brevipes* there is evidence for both isolation by distance (IBD) and adaptation of  
66 coastal populations to saline environmental gradients (Branco et al. 2015). Species in  
67 *Saccharomyces* show varying levels of geographic structure in their genetic differentiation, with  
68 *S. paradoxus* showing clear evidence of IBD and *S. cerevisiae* showing much less geographic  
69 structure (Liti et al. 2009). Taylor et al. (2015) reviewed the literature on clonal reproduction in  
70 fungi, concluding that numerous species showed evidence for recombination regardless of  
71 observed reproductive structures. Additional examples of similar observations, indicating that  
72 fungal reproduction and population genetics are more complex than previously expected, have  
73 been derived from population genetic and genomic data in other groups of non-lichenized fungi  
74 (see review in Grünwald et al. (2016) and Peter and Schacherer (2016)).

75           Lichens are a major group of fungi that form obligate symbioses with algae and/or  
76 cyanobacteria and comprise >20% of all ascomycetes (Lücking et al. 2016). Despite their  
77 ecological importance and conspicuous abundance in many terrestrial ecosystems, relatively few

78 taxa have been studied with traditional population genetics methods, and no published studies  
79 have used a genome-wide approach to assess gene flow or other population-level attributes. To  
80 date, most population genetics studies of lichens have been conducted on *Lobaria pulmonaria*  
81 and its algal photobiont *Dictyochochloropsis reticulata* using microsatellite markers (Widmer et al.  
82 2010, Dal Grande et al. 2010, Nadyeina et al. 2014). These studies have shown that *L.*  
83 *pulmonaria* frequently disperses short distances via lichenized propagules (bundles of algae and  
84 fungi), infrequently disperses long distances via sexually produced fungal spores (Werth et al.  
85 2006), and that there is evidence of adaptation and population isolation on small spatial scales  
86 (Nadyeina et al. 2014). Population genetic patterns in another lichenized fungus, *Xanthoria*  
87 *parietina*, based on RAPD-PCR markers, contrast starkly with the findings for *L. pulmonaria*; in  
88 the former, high genetic diversity and very few clones were found within small areas, even  
89 among adjacent individuals (Itten and Honneger 2010). The pattern recovered in *X. parietina* is  
90 similar to a study of *Parmelina carporrhizans* based on microsatellite loci, where high rates of  
91 migration were recovered among populations, except for isolated island populations (Alors et al.  
92 2017). A microsatellite-based study on *Parmotrema tinctorum* and its algal symbiont found that  
93 most dispersal was clonal over short distances, similar to *L. pulmonaria*, but still found evidence  
94 for high rates of sexual reproduction in the fungus (Mansournia et al. 2012). While highly  
95 detailed, these studies of lichen population genetics represent only a fraction of this diverse  
96 group of fungi that have evolved an obligate symbiotic lifestyle at least seven times  
97 independently throughout the fungal tree of life (Schoch et al. 2009), and occupy every terrestrial  
98 ecosystem from the poles to the tropics (Brodo et al. 2001). Microsatellites have recently been  
99 developed for a broader diversity of lichenized fungi (Magain et al. 2010; Devkota et al. 2014;

100 Nadyeina et al. 2014; Lindgren et al. 2016; Lutsak et al. 2016), however these tools have not yet  
101 been utilized for population genetic analyses in lichens.

102         Population genomics is a promising approach to rapidly advance our knowledge of  
103 population biology in lichens as it circumvents difficulties associated with developing species-  
104 specific markers, especially since lichens are notoriously difficult and slow to culture (Crittenden  
105 *et al.* 1995). Of the domains of eukaryotic organisms, fungi are one of the most amenable to  
106 genomic studies due to their generally small, compact genomes (Gladieux et al. 2014).  
107 Population genomics studies have already added substantial depth and breadth to the knowledge  
108 of the basic fungal biology, allowing researchers to address questions that were once intractable  
109 about life history and evolution of reproductive systems. For example, fungi that have only been  
110 observed reproducing asexually show genomic evidence for sexual reproduction (Tsai et al.  
111 2008; Stefanini et al. 2016); speciation through homoploid hybridization has been shown to  
112 occur rapidly, at least in yeast (Leducq et al. 2016); and Glomerales, arbuscular mycorrhizal  
113 fungi, have highly flexible levels of ploidy in the heterokaryotic cells within species (Wyss et al.  
114 2016). Applying these methods to lichenized fungi holds great promise to rapidly advance  
115 knowledge of lichen population biology.

116         The rock gnome lichen (*Cetradonia linearis*) is one of two fungal species protected by  
117 the Endangered Species Act in the United States (USFWS 2013), and one of eight lichens on the  
118 IUCN Red-List (Allen et al. 2015). It is narrowly endemic to the Southern Appalachians of  
119 eastern North America, where it is known from ~100 populations, most of which are located in  
120 western North Carolina (USFWS 2013). It forms colonies on rocks either on exposed cliffs at  
121 high-elevations or on large boulders in mid- to high-elevation streams. *Cetradonia* is a  
122 monotypic genus, whose position as the earliest diverging member of the widespread and

123 ecologically important Cladoniaceae makes its study essential for addressing hypotheses of  
124 evolution in this family (Wei and Ahti 2002; Zhou et al. 2006). It forms colonies of simple to  
125 branched squamules with black apothecia and/or pycnidia, reproductive structures, frequently  
126 produced at the tips (Fig.1). Despite having been protected by the Endangered Species Act for  
127 over 20 years, little is known about *C. linearis* beyond its distribution (USFWS 2013). Currently,  
128 nothing is known about dispersal or population genetic structure in this species.

129         In this study, we tested three hypotheses concerning population-level processes in  
130 *Cetradonia linearis*: 1) most reproduction and dispersal occurs through clonal processes, 2)  
131 isolation by distance is the major force shaping the genetic differentiation, while ecological  
132 adaptation plays a minor role, and 3) the southern portion of its current extent represents a major  
133 refugium during the Pleistocene glaciation. To test these hypotheses, low-coverage, whole  
134 genome shotgun sequencing was used to generate large-quantities of genomic data from samples  
135 throughout the species' range. The resulting genome-wide single-nucleotide polymorphisms  
136 (SNPs) were used to measure genetic diversity, recombination, and clonality. Population genetic  
137 structure, connectivity, and evidence for isolation by environment were also investigated. This  
138 study is the first assessment of population genomics in a lichen, providing a baseline for  
139 comparison in this group of organisms, along with valuable information for the continued  
140 conservation of the endangered rock gnomer lichen.

## 141 **Methods**

### 142 *Study System, Sampling, and Sequencing*

143         Samples were collected from 15 sites throughout the geographic and ecological range of  
144 *Cetradonia linearis* (Fig. 2). At each site two to three squamules were taken from up to ten  
145 distinct colonies using surface sterilized forceps. Squamules were placed into 1.5 mL Eppendorf

146 tubes, set out to air dry for 24 hours, then stored at  $-40^{\circ}\text{C}$ . Samples were washed with acetone  
147 and DNA was extracted using the Qiagen DNeasy Plant Mini Kit with the cell lysis stage  
148 extended for 4-6 hours. Thirty-two samples were chosen for sequencing based on DNA quality  
149 and yield, while maintaining the geographic and ecological breadth of samples. Sequencing was  
150 conducted at the Rockefeller University Genomics Resource Center. Libraries were prepared  
151 with the Nextera XT kit and sequenced on the Illumina Next Seq platform in Mid Output on 150  
152 bp paired end read mode. All samples were sequenced at roughly equal coverage, except one  
153 sample from the Balsam Mountains, B224, which was sequenced at 5x higher coverage for  
154 assembly of a reference genome.

#### 155 *Quality Filtering, Genome Assembly, and Annotation*

156 A reference genome was assembled from sample B224 and annotated after strictly  
157 filtering contaminating reads (see below). B224 reads were trimmed, adapters were removed,  
158 and overlapping read-pairs combined using cutadapt and FLASH (Magoč and Salzberg 2011;  
159 Martin 2011). Read pools for all other samples were trimmed, adapters were removed, and  
160 overlapping read-pairs combined using FLASH and Trimmomatic v 0.36 (Bolger et al. 2014).  
161 An initial assembly of B224 was built using Minia with a kmer size of 75 and an abundance  
162 minimum of 3 (Chikhi and Rizk 2013). To filter out contaminants (including algal symbionts)  
163 the Blobology workflow and perl scripts were used (Kumar et al. 2013). Specifically, a random  
164 subset of 15,000 contigs longer than 250 bp were subjected to homology search using megablast  
165 against the non-redundant nucleotide database from Genbank and the e-value cutoff was set to  
166  $1e-5$ . Based on these plots (Supplementary Fig. 1) contigs with GC content  $>0.6$  and coverage  $<5$   
167 were pooled to form a set of contaminant contigs. Then, all B224 reads were aligned to the  
168 contaminant contigs using bowtie2, and all reads that did not align to the contaminants were

169 retained for reassembly. The final assembly was built using Abyss with the paired-end read  
170 setting and a kmer size of 41 (Simpson et al. 2009). All resulting contigs shorter than 500 bp  
171 were removed from the dataset before further analyses. Genome annotation was conducted using  
172 the MAKER pipeline (Cantarel et al. 2008). SNAP was used for the ab-initio gene predictor, and  
173 protein homology evidence was drawn from *Aspergillus niger* ATCC 1015 v4.0, *Cladonia grayi*  
174 *Cgr/DA2myc/ss v2.0*, and *Cochliobolus heterostrophus* C5 v2.0 (Andersen et al. 2011; Ohm et  
175 al. 2012; Condon et al. 2013; McDonald et al. 2013; Leskovec and Sosič 2016). For a final  
176 filtering step, all genes were blasted against the *A. niger*, *C. grayi*, and *C. heterostrophus* gene  
177 sets. Contigs were only kept for downstream analysis if the gene with the highest-scoring blast  
178 hit matched most closely with a *C. grayi* gene. Because the *C. grayi* genome was assembled  
179 from pure culture of the fungal symbiont, this was an additional step that filtered any remaining  
180 contaminants from the genome. Finally, we conducted homology searches for both mating-type  
181 idiomorphs (MAT1-2 and MAT2-2) in the genome and all sampled read pools (Supplementary  
182 Text).

### 183 *SNP Calling and descriptive statistics*

184 Single-nucleotide polymorphisms were called for all sequenced samples using the  
185 annotated contigs as a reference genome for the fungal component. First, we used bwa (Li and  
186 Durbin 2009) to align the reads to the contigs. Then, to call the SNPs from this alignment  
187 FreeBayes was used with the ploidy set to 2, minimum alternate fraction set to 0.9 (Garrison and  
188 Marth 2012). The ploidy was set to two because all samples were fertile, thus there were  
189 potentially two genetic individuals present (we also conducted the same analyses with the ploidy  
190 set to one, without a change in results). Average nucleotide diversity were calculated using  
191 VCFtools (Danecek et al. 2011). Linkage distance was calculated between all sites using PLINK



192 1.9 and plotted in R with the non-linear least squares smoothing function implemented for the  
193 trendline to create a linkage decay chart (Gaunt et al. 2007). Linkage disequilibrium was  
194 corrected for using the R package poppr with a threshold of 0.2 and a 1 Kb sliding window  
195 (Kamvar et al. 2014). Then, pairwise  $F_{ST}$  was calculated among all sampling sites and  
196 populations with the linkage disequilibrium corrected dataset using BEDASSLE (Bradburd et al.  
197 2015), a Bayesian inference program that estimates the relative influence of ecological and  
198 geographic distance on genetic distance. This program automatically excludes sites with missing  
199 data when calculating  $F_{ST}$  (Bradburd et al. 2015). The dataset was checked for clones by  
200 searching for multi-locus genotypes that are >95% identical to account for sequencing and SNP  
201 calling errors using the `mlg.filter` function in the R package popper with a threshold of 0.05  
202 (Kamvar et al. 2014).

### 203 *Statistical Analyses*

204 First, the relationships among populations were explored to determine if there were  
205 phylogenetic signals for each distinct sampling site and mountain range, and at what spatial scale  
206 the relationships were clearest. Three methods were used to explore population structure:  
207 InStruct, Discriminant Analysis of Principle Components (DAPC), and a neighbor-joining tree.  
208 InStruct is a Bayesian clustering program that infers self-fertilization rates and clusters  
209 individuals into subpopulations using a Markov chain Monte Carlo (MCMC) algorithm (Gao et  
210 al. 2007). InStruct was run with K values between one and 10, with five independent chains per  
211 K value. Each chain was run with a 100,000 iteration burn-in period, followed by 10,000  
212 iterations after burn-in. Mode 2 was used to infer subpopulation structure and selfing rate. The  
213 run with the highest DIC was chosen to represent the population structure and inferred selfing  
214 rate. We also implemented DAPC, a multivariate approach to identifying genetically distinct

215 clusters of individuals, with the clustering algorithm implemented to define groups resulting in  
216 10 genetic clusters chosen based on the BIC (Jombart et al. 2010). This method was specifically  
217 designed to cope with the large quantity of next generation sequencing data and implemented in  
218 R through the package adegenet 2.0 (Jombart 2008). An unrooted neighbor-joining tree was also  
219 built to infer the relationships among individuals based on bitwise distances using the R package  
220 ape (Paradis et al. 2004).

221         The influence of geographic and ecological distance on genetic distance was investigated  
222 using two approaches. First, a partial Mantel test with 10,000 permutations was used to test for  
223 correlation between genetic distance, measured as pairwise  $F_{st}$ , and geographic distance  
224 (Euclidean distance in kilometers), and a set of four environmental variables. The set of four  
225 environmental variables were habitat (boulder in stream vs. exposed rock outcrop) and three non-  
226 colinear variables from the widely-used Worldclim dataset: mean temperature of wettest quarter  
227 (BIO8), mean temperature of warmest quarter (BIO10), and annual precipitation (BIO12)  
228 (Hijmans et al. 2005). These last three variables were retained after removing all correlated  
229 climatic variables from Worldclim (see Species Distribution Modeling, below). The habitat  
230 variable was based on field observations of the species made while collecting samples. Second, a  
231 Bayesian approach as implemented in BEDASSLE was used to estimate the contributions of  
232 geographic and ecological distance to genetic distance (Bradburd et al. 2013). The same set of  
233 ecological and geographic distance variables were used as input data, along with allele sample  
234 sizes and frequencies in all samples. An initial Bayesian analysis, run for 1 million generations,  
235 indicated that the effect size of BIO8 and BIO12 were very close to zero, and these were  
236 removed from the dataset. A second analysis was run retaining the habitat and BIO10 as  
237 environmental variables for 5 million generations with a sample frequency of 10. A third

238 analysis was conducted retaining only the habitat as the environmental variable and was run for  
239 10 million generations with a sample frequency of 10. Trace plots were examined for  
240 convergence, and mean marginal densities and 95% confidence intervals calculated for  $\alpha E:\alpha D$   
241 for each environmental variable with the first 50% of generations treated as burn-in and  
242 removed.

### 243 *Reproductive Morphology*

244 To determine whether reproductive structures were observable in *Cetradonia* specimens,  
245 fertile samples were dissected to search microscopically for trichogynes, specialized hyphae that  
246 receive spermatia (conidia) to begin sexual reproduction, and fertile apothecia, structures that  
247 produce fungal spores that are produced through meiosis. Thin sections of five apothecia from  
248 three sampling sites were cut by hand with a razor blade through apothecia and mounted on  
249 slides. Sections were stained with phloxine and cleared with potassium hydroxide before  
250 examination under a compound microscope.

### 251 *Species Distribution Modeling*

252 Species distribution modeling was used to investigate if the sites with the highest genetic  
253 diversity were located in an area that was likely a refugium during the Last Glacial Maximum  
254 (LGM). To model past distributions, we first built a species distribution model (SDM) to predict  
255 the probability of a species' presence across the landscape for the present, then projected this  
256 SDM to past climates. Species distribution modeling was conducted using Maxent v. 3 (Phillips  
257 et al. 2006, Phillips and Dudik 2008) after steps were taken to reduce sampling bias and calibrate  
258 the model. First, localities were thinned by a 5 km radius to reduce sampling bias by randomly  
259 excluding one of two localities when they fell within that radius, as implemented in the R  
260 package SpThin (Aiello-Lammens et al. 2015). After thinning, 42 out of the 101 original

261 localities were retained and used for all further analyses. The worldclim dataset of 19 bioclimatic  
262 variables was used for the environmental data at 10 arc second resolution for the present and 2.5  
263 arc minutes for the last glacial maximum. All autocorrelated variables were first removed,  
264 leaving mean temperature of wettest quarter (BIO8), mean temperature of warmest quarter  
265 (BIO10), and annual precipitation (BIO12) (Hijmans et al. 2005). These three variables were  
266 clipped to the extent of the species known range, with a small buffer, for environmental variables  
267 from the present and LGM. Two modeling parameters were tuned to identify the best level of  
268 complexity for the model: feature classes define the allowed shape of the environmental variable  
269 response curves, and the regularization multiplier controls for complexity, with higher values  
270 increasingly penalizing complexity (Scheglovitova and Anderson 2013). The best modeling  
271 parameters were chosen based on the Akaike Information Criterion corrected for sample size  
272 (AICc) (Warren and Seifert 2011). Model tuning was implemented using the R package  
273 ENMEval with the ‘blocks’ setting (Muscarella et al. 2014). The final model was built and  
274 projected using all thinned localities with the regularization multiplier set to 3.5 and linear,  
275 quadratic, and hinge response curves allowed.

## 276 **Results**

277 High-coverage, whole-genome shotgun sequencing of one individual of *Cetradonia*  
278 *linearis* was obtained and used to assemble a reference genome. Whole-genome shotgun  
279 sequencing of 31 additional individuals were mapped to this genome, and the resulting SNPs  
280 were used to infer the population structure, biogeographic history, and mating system of the  
281 species.

282 *Cetradonia linearis* Reference Genome

283 Multiple steps of stringent quality and contaminant filtering resulted in the production of  
284 a high-quality, partial reference genome. The original read pool from the sample used to create  
285 the reference genome, sample B224, contained 55 million reads, for a total of 16 Gb. The mean  
286 PHRED quality score was 33. After trimming, filtering for low quality base calls, and merging  
287 paired ends there were 44 million merged reads (where two paired-end reads overlapped and  
288 merged into a single sequence) with a total of 5.6 Gb of sequence, and 8.3 million read pairs that  
289 did not overlap with a total of 2.1 Gb of sequence. The initial assembly using Minia built 32,669  
290 contigs. When contigs under 500 bp were excluded, the total assembly length was 105.5 Mb and  
291 the N50 was 3,814 bp. After filtering contaminants, 41.9 million merged reads with 5.4 Gb of  
292 sequence remained, as well as 7.6 million paired-end read with 2.0 Gb of sequence. These  
293 filtered reads were then assembled, which built 17,199 contigs with a total length of 40.0 Mb and  
294 an N50 of 6,093. This assembly was then annotated with protein homology data from *Aspergillus*  
295 *niger* ATCC 1015 v4.0, *Cladonia grayi* Cgr/DA2myc/ss v2.0, and *Cochliobolus heterostrophus*  
296 C5 v2.0 and ab-initio prediction using SNAP. Then, only contigs for which the annotated gene  
297 with the best blastp score against *C. grayi* and *A.niger* proteins most closely matched *C. grayi*  
298 were retained for the final reference genome to be used in all downstream analyses. This  
299 reference genome was comprised of 2,703 contigs with a total length of 19.5 MB, a contig N50  
300 of 10,095 bp, and an average coverage of 54.7 X. CEGMA (Parra et al. 2007) analysis of  
301 conserved gene content showed that 74% of universally conserved genes are present in our  
302 assembly, suggesting that our assembly is approximately 74% complete. Consistent with this,  
303 our assembly was 53-70% as large as the three genomes available for other species in the  
304 Cladoniaceae (28 Mb-37 Mb; Armeleo and May 2009; Park et al. 2013). The MAT1-2  
305 idiomorph was located in the reference genome, and in 14 of 32 read pools (Supplementary text).

306 No MAT1-1 genes were located in any samples. Because only one mating type was discovered  
307 we preliminarily determine that the mating system of *C. linearis* may be homothallic, and  
308 specifically unisexual (Wilson et al. 2015).

### 309 *Cetradonia linearis* Population Structure

310 To call SNPs, all read pools were aligned to the reference genome. A total of 126,662  
311 SNPs were identified. After correcting for linkage disequilibrium 10,026 SNPs remained. This  
312 large reduction in SNPs after correcting for linkage disequilibrium suggests a low rate of  
313 recombination. Examination of the linkage decay plot further supports the hypotheses of low  
314 recombination rates, as the linkage between sites never falls below 0.2 (Fig. 3). In the dataset  
315 used for subsequent analyses the average SNP coverage was 66%, and the coverage per  
316 population ranged from 52.6-98.6% (Table 1). Nucleotide diversity ( $\pi$ ) within sampling sites  
317 ranged from 0.084 for one site in the Great Smoky Mountains, to 0.18 for one site in the Black  
318 Mountains. When the samples were grouped by mountain range, nucleotide diversity ranged  
319 from 0.148-0.338 (Table 1). Pairwise  $F_{st}$  values between sites ranged from 0.312 to 0.730  
320 (Supplementary Table 1).

321 Population structure was first explored through relational analyses. The unrooted NJ tree  
322 recovered distinct, mutually exclusive groups that corresponded to distinct mountain ranges (Fig.  
323 2). Sampling sites also largely formed mutually exclusive groups, except PV. The one PV  
324 sample that did not cluster with other PV samples formed a group with SH, a site that was only  
325 1.5 km downstream. The InStruct analysis chain with the highest DIC found seven clusters (Fig.  
326 2). Four primary clusters were evident in the results: one that included all samples from the Great  
327 Smoky Mountains, one from the southern Nantahalas, one that included the Balsam Mountains  
328 and Roan Mountain, and one that included all samples from the Black Mountains (Fig. 2). The

329 mean posterior distribution of selfing rates averaged 0.59, with the mean, followed by the  
330 variance, for each cluster inferred as follows: 1 = 0.475 (0.085), 2 = 0.511 (0.087), 3 = 0.585  
331 (0.074), 4 = 0.606 (0.015), 5=0.620 (0.016), 6 = 0.665 (0.008), 7 = 0.666 (0.014). Ten clusters  
332 were found as the most likely grouping of the samples using DAPC. Most clusters were  
333 comprised of all individuals from single sampling sites. Group four was the only one that  
334 included samples from multiple sites, for a total of 15 individuals from nine sites that included  
335 the Great Smoky Mountains, Balsam Mountains, Nantahala Mountains, and Roan Mountain  
336 (Supplement Fig. 2). Each of the three sites sampled from the Black Mountains formed their own  
337 distinct group, despite their close proximity to each other (1-173 km apart).

338 We tested the influence of geographic versus environmental distance on genetic distance  
339 using two methods, and both showed geographic distance as a more significant factor correlating  
340 with population structure. First, a partial Mantel Test showed a significant correlation between  
341 genetic distance, measured as pairwise  $F_{st}$ , and geographic distance, measured as pairwise  
342 Euclidean distance in km, where  $r = 0.489$ , and  $p < 0.01$  (Fig. 4). There were no correlations  
343 between genetic distance and any of the environmental distances (Supplementary Table 2). The  
344 second analysis was a Bayesian approach implemented in the program BEDASSLE (Bradburd et  
345 al. 2013). Here, the relevant value is the ratio of effect size of each environmental variable versus  
346 the effect size of the geographic distance ( $\alpha E:\alpha D$ ). The results were similar to the partial Mantel  
347 test, and geographic distance far outweighed the effect of environmental distance. Specifically,  
348 the results of the first analysis, which included both habitat and BIO10 as environmental  
349 variables, estimated the habitat  $\alpha E:\alpha D = 0.712$  (95% CI = 0.544, 0.978) and the BIO10  $\alpha E:\alpha D =$   
350 0.026 (95% CI = 0.020, 0.036). This can be interpreted as follows: the effect of 10° C mean  
351 temperature of the warmest quarter was equal to the effect of 0.026 km of geographic distance,

352 and the effect of occurrence in different habitats was equal to 0.75 km of geographic distance. In  
353 the second analyses, where only habitat was retained as an environmental variable, the habitat  
354  $\alpha E:\alpha D = 0.309$  (95% CI = 0.011, 1.408). Hindcasting the SDM of *Cetradonia linearis* supported  
355 the hypothesis that its refugial range was located predominantly in the southern edge of its  
356 current range during the LGM (Fig.5). The quality of the SDM was high, with an AUC of 0.919.

## 357 **Discussion**

358 An understanding of diversification mechanisms in lichens has been hampered by a lack  
359 of population genetic studies in these diverse clades of fungi. This study is the first to report the  
360 results of a genomic approach for investigating the population structure of a lichen. Low-  
361 coverage whole-genome sequencing of lichen fragments produced large quantities of SNP data  
362 (>122,000 SNPs) among individuals within a species, even after contaminants were removed by  
363 stringent filtering. These results demonstrate that culturing is not required for lichen population  
364 genomics. The original hypothesis that the main dispersal strategy of *Cetradonia linearis* is  
365 through clonal propagation was not supported, as no clones were identified across or within sites.  
366 However, there is evidence that the species less frequently undergoes outcrossing and sexual  
367 recombination based on the high rates of linkage disequilibrium (~122K SNPs reduced to ~10K,  
368 Fig. 3), estimated selfing rates >0.5, and the putatively unisexual mating system.

369 In contrast to prior work suggesting fungi are not dispersal-limited, the hypothesis that  
370 there are low rates of gene flow among populations was supported by high  $F_{st}$  values (0.312-  
371 0.730), significant correlation between genetic and geographic distance (Mantel Test,  $r = 0.489$ ,  
372  $p < 0.01$ ), and proportionally higher influence of geographic distance on genetic distance when  
373 compared to environmental distance ( $\alpha E:\alpha D < 1$ ). There was no evidence for isolation by  
374 environment based on the partial Mantel test and BEDASSLE results. However, further studies



375 of other environmental variables, such as average high temperatures of warm months or quarters,  
376 may reveal signals of adaptation not recovered here. Additionally, future spore trapping and  
377 viability assays would be a useful way to directly measure dispersal potential. The sites with the  
378 highest genetic diversity were concentrated in the southern portion of the range of the taxon as  
379 predicted, suggesting that these may have acted as refugial areas during the LGM. The results of  
380 this study support the notion that gene flow among fungal populations decreases with distance -  
381 populations show strong signs of IBD despite the production of small propagules (O'Malley  
382 2007) - suggesting that genetic drift may represent a more important process in diversification of  
383 lichenized fungi than previously appreciated. Our data also indicate that recombination can be  
384 low despite the frequent presence of sexual spore producing structures. This finding highlights  
385 the phenomenon that observed reproductive mode does not necessarily translate directly to the  
386 frequency of recombination (Taylor et al. 2015).

### 387 *Influence of Reproductive Strategy on Population Genetic Structure in Lichens*

388 Our data on *Cetradonia linearis* contribute to a growing understanding of the relationship  
389 between fungal reproductive types and genetic diversity and structure. Three species of  
390 lichenized fungi were previously examined with detailed population genetic studies including  
391 analysis of the mating-system (Itten and Honegger 2010; Singh et al. 2012; Alors et al. 2017).  
392 One of these species was investigated with RAPD-PCR and the other two with microsatellites, so  
393 comparisons among the studies, and with our study based on genomic data, must be done with  
394 consideration of the very different underlying data. Nonetheless, because there are no genomics  
395 studies on lichen population genetic structure currently published, a careful comparison of our  
396 results with this previous research is useful. The lichen *Xanthoria parietina* was found to be  
397 unisexual, having only the MAT1-2 gene present in all individuals investigated, and no observed

398 instances of trichogynes, though it is almost always fertile (Scherrer et al. 2005). The population  
399 genetic structure of *X. parietina* based on RAPD-PCR fingerprinting revealed high rates of  
400 genotypic diversity within populations, even on a microsites scale, and much lower genetic  
401 diversity between populations than within them (Itten and Honegger 2010). A study of the lichen  
402 *Parmelina carporrhizans* found a similar pattern of very high gene flow among most populations  
403 sampled, though it is a heterothallic species (Alors et al. 2017). The pattern observed in these  
404 two species starkly contrasts with that of *Lobaria pulmonaria*, a heterothallic species that is often  
405 observed without sexual reproductive structures, in which apothecia usually are not produced  
406 until individuals are 15-25 years old (Denison 2003; Høistad and Gjerde 2011; Singh et al.  
407 2012). *Lobaria pulmonaria* consistently displays high rates of clonality within populations and  
408 sampling sites (Werth et al. 2006; Sing et al. 2012). One way to explain the difference between  
409 the population genetic patterns of the two heterothallic species is the ratio of the two alternate  
410 MAT idiomorphs: *L. pulmonaria* ratios are often skewed in populations while *P. carporrhizans*  
411 populations have equal ratios (Singh et al. 2012; Alors et al. 2017). Population genetic structure  
412 and biology of *Cetradonia linearis* is more similar to *X. parietina* and *P. carporrhizans* because  
413 1) it is almost always fertile, 2) no clones have been identified (defined as >95% shared SNPs for  
414 the genomic data), even from closely collected colonies, and 3) there is a high level of  
415 polymorphism within each population ( $\pi = 0.148 - 0.338$ ). However, our results indicate *C.*  
416 *linearis* populations have low rates of gene flow, which contrasts with the pattern of little genetic  
417 structure found in both *X. parietina* and *P. carporrhizans*. Additional studies using genomics to  
418 investigate population genetics in lichenized fungi will allow more direct comparisons of genetic  
419 structure across diverse fungal clades. These results, along with the high rate of linkage

420 disequilibrium, suggest that while *C. linearis* does not seem to frequently reproduce clonally,  
421 there must be some rate of self-fertilization or clonality and dispersal restriction that leads to the  
422 genetic isolation of populations. To draw large-scale conclusions about the influence of observed  
423 reproductive mode on recombination, further studies tackling a greater breadth of taxonomic  
424 sampling throughout lichenized fungi will be required. Specific efforts are needed to target  
425 phylogenetic, morphological, ecological, and reproductive diversity to determine what factors  
426 most strongly shape recombination.

#### 427 *Biogeographic History*

428         The southern Appalachian Mountain Range is one of the oldest continuously exposed  
429 land masses on earth, and has served as a refugium at multiple points in geological history  
430 (Braun 1950). Thus, though it is a relatively small area, the long and complex geological history  
431 of the region has shaped similarly strong, complex population genetics patterns in endemic  
432 species across multiple domains of life (Manos and Meireles 2015). The population genetics of  
433 *C. linearis* are no exception. The southern portion of the current extent of *C. linearis* was likely a  
434 refugium during Pleistocene glaciation. The lines of evidence to support this hypothesis include  
435 the observation that genetic diversity is higher in southern populations and location of suitable  
436 areas predicted by the hindcast SDM (Fig. 5). Interestingly, the model also suggested an  
437 expansion of the range to lower elevation areas (Fig. 5). This finding is consistent with  
438 hypotheses that ranges of present-day high-elevation endemics expanded downslope during  
439 Pleistocene glaciation (Crespi et al. 2003; Bruhl 1997; Premoli et al. 2007; Desamore et al.  
440 2010). While this downslope expansion might have been expected to connect populations and  
441 diminish the signal of IBD, the data generated for this study still show a strong geographic signal  
442 of increasing structure with distance. Population genetic studies of other high-elevation, southern

443 Appalachian endemics showed similarly strong signals of IBD, including the salamander  
444 *Desmognathus wrightii* (Crespi et al. 2003) and the spider *Hypochilus pococki* (Keith and Hedin  
445 2012). A further parallel between the genetic structures of *D. wrightii* and *C. linearis* is that  
446 Roan Mountain populations did not group with populations from the Black Mountains, despite  
447 their close geographic proximity (Crespi et al. 2003). Population differentiation was so strong in  
448 *Hypochilus pococki* that the authors suggested it may actually be comprised of multiple cryptic  
449 species (Keith and Hedin 2012). The long and complex geological history of the southern  
450 Appalachians has resulted in not only high levels of species diversity, but also high genetic  
451 diversity within species.

## 452 **Conclusion**

453         The results presented here provide strong evidence that the rare, narrowly endemic  
454 fungus *Cetradonia linearis* has highly geographically isolated populations over the small area of  
455 its distribution (Fig. 2). The population structure of *C. linearis* is congruent with other high-  
456 elevation southern Appalachian endemics, suggesting that dispersal among mountain peaks in  
457 the region is not frequent for multiple groups of organisms (Crespi et al. 2003; Keith and Hedin  
458 2012; Fig. 5). We found no evidence of clones in our sampling, however we did find evidence  
459 for low rates of recombination, possibly facilitated by a homothallic reproductive system that  
460 allows self-fertility (Fig. 3). These results support a growing body of literature suggesting that  
461 fungal dispersal can be limited across relatively small spatial scales, despite the production of  
462 very small propagules (O'Malley 2007; Taylor et al. 2012). While other studies have found a  
463 strong influence for environmental factors influencing population structure of fungi (Branco et  
464 al. 2015), we found no evidence for isolation by environment (Supplement Table 1). Future  
465 comparative studies are required to full understand how extrinsic and intrinsic factors shape the

466 population structure and recombination rates of fungi with different ecological requirements, life  
467 histories, and reproductive strategies (Grünwald et al. 2016; Peter and Schacherer 2016). These  
468 studies will be facilitated by rapid advancements in population genomics methods, which  
469 promise to reshape current perspective on fungal biology.

#### 470 **Acknowledgements**

471 We would like to thank the following people for aiding with this research: Alex Cecil and Jenna  
472 Dorey for their field assistance, Gary Kauffman for help locating populations throughout the  
473 National Forest and many helpful discussions about *Gymnoderma*, Chris Ulrey for help locating  
474 the species on Blue Ridge National Park land, and especially for rappelling expertise, Dr. Richard  
475 Harris for conducting microscopy to search for trichogynes and spores. Library preparations and  
476 sequencing was conducted at The Rockefeller Genome Resource Center. Funding for this  
477 research came from Highlands Biological Station, NSF GRFP, and NSF DEB#1145511.

#### 478 **Literature Cited**

- 479 Aiello-Lammens, M. E., Boria, R. A., Radosavljevic, A., Vilela, B., Anderson, R. P. 2015.  
480 spThin: an R package for spatial thinning of species occurrence records for use in  
481 ecological niche models. *Ecography* 38: 541–545.
- 482 Allen, J. L., Lendemer, J.C., McMullin, T. 2015. *Cetradonia linearis*. *The IUCN Red List of*  
483 *Threatened Species 2015* e.T70386009A70386019.
- 484 Alors, D., Grande, F. D., Cubas, P. *et al.* 2017. Panmixia and dispersal from the Mediterranean  
485 Basin to Macaronesian Islands of a macrolichen species. *Sci. Rep* 7: 40879.
- 486 Altschul, S. F., Gish, W., Miller, W., Myers, E. W., Lipman, D. J. 1990. Basic local alignment  
487 search tool. *J. Mol. Biol.* 215: 403–410.

- 488 Andersen, M. R., Salazar, M. P., Schaap, P. J. *et al.* 2011. Comparative genomics of citric-acid-  
489 producing *Aspergillus niger* ATCC 1015 versus enzyme-producing CBS 513.88. *Genome*  
490 *Res.* 21: 885–897.
- 491 Armaleo, D., May, S. 2009. Sizing the fungal and algal genomes of the lichen *Cladonia*  
492 *grayi* through quantitative PCR. *Symbiosis* 49: 43.
- 493 Bolger, A. M., Lohse, M., Usadel, B. 2014. Trimmomatic: a flexible trimmer for Illumina  
494 sequence data. *Bioinformatics* 30: 2114–2120.
- 495 Bradburd, G. S., Ralph, P. L., Coop, G. M. 2013. Disentangling the effects of geographic and  
496 ecological isolation on genetic differentiation. *Evolution* 67: 3258–3273.
- 497 Branco, S., Gladieux, P., Ellison, C. E. *et al.* 2015. Genetic isolation between two recently  
498 diverged populations of a symbiotic fungus. *Mol Ecol* 24: 2747–2758.
- 499 Braun, L. E. 1950. *Deciduous Forests of Eastern North America*. The Blackburn Press, Caldwell,  
500 NJ.
- 501 Brodo, I. M., Sharnoff, M. S. D., Sharnoff, S. 2001. *Lichens of North America*. Yale University  
502 Press, New Haven, CT.
- 503 Bruhl, C. A. 1997. Flightless insects: A test case for historical relationships of African  
504 mountains. *J. Biogeogr* 24: 233–250.
- 505 Cantarel, B. L., Korf, I., Robb, S. M. C. *et al.* 2008. MAKER: an easy-to-use annotation pipeline  
506 designed for emerging model organism genomes. *Genome Res.* 18: 188–196.
- 507 Chikhi, R., Rizk, G. 2013. Space-efficient and exact de Bruijn graph representation based on a  
508 Bloom filter. *Algorithms Mol. Biol.* 8: 22.

- 509 Condon, B. J., Leng, Y., Wu, D. *et al.* 2013. Comparative genome structure, secondary  
510 metabolite, and effector coding capacity across *Cochliobolus* pathogens. *PLoS Genet.* 9:  
511 e1003233.
- 512 Crespi, E. J., Rissler, L. J., Browne, R. A. 2003. Testing Pleistocene refugia theory:  
513 phylogeographical analysis of *Desmognathus wrighti*, a high-elevation salamander in the  
514 southern Appalachians. *Mol. Ecol.* 12: 969–984.
- 515 Crittenden, P. D., David, J. C., Hawksworth, D. L., Campbell, F. S. 1995. Attempted isolation  
516 and success in the culturing of a broad spectrum of lichen-forming and lichenicolous  
517 fungi. *New Phytol.* 130: 267–297.
- 518 Dal Grande, F., Widmer, I., Beck, A., Scheidegger, C. 2010. Microsatellite markers  
519 for *Dictyochloropsis reticulata* (Trebouxiophyceae), the symbiotic alga of the  
520 lichen *Lobaria pulmonaria* (L.). *Conserv. Genet.* **11**: 1147–1149.
- 521 Danecek, P., Auton, A., Abecasis, G. *et al.* 2011. The variant call format and  
522 VCFtools. *Bioinformatics* 27: 2156–2158.
- 523 Denison, W. C. 2003. Apothecia and ascospores  
524 of *Lobaria oregana* and *Lobaria pulmonaria* investigated. *Mycologia* 95: 513–518.
- 525 Desamore, A., Vanderpoorten, A., Laenen, B., Gradstein, S. R., Kok, P. J. R. 2010.  
526 Biogeography of the Lost World (Pantepui region, northeastern South America): Insights  
527 from bryophytes. *Phytotaxa* 9: 254–265.
- 528 Devkota, S., Cornejo, C., Werth, S., Chaudhary, R. P., Scheidegger, C. 2014. Characterization of  
529 microsatellite loci in the Himalayan lichen fungus *Lobaria*  
530 *pindarensis*(Lobariaceae). *Appl. Plant Sci.* 2: 1300101.

- 531 Dyer, P. S. 2008. Evolutionary biology: genomic clues to original sex in fungi. *Curr. Biol.* 18:  
532 R207–9.
- 533 Gao, H., Williamson, S., Bustamante, C. D. 2007. A Markov chain Monte Carlo approach for  
534 joint inference of population structure and inbreeding rates from multilocus genotype  
535 data. *Genetics* 176: 1635–1651.
- 536 Garrison, E., Marth, G. 2012. Haplotype-based variant detection from short-read  
537 sequencing. *arXiv [q-bio.GN]*.
- 538 Gladieux, P., Ropars, J., Badouin, H. *et al.* 2014. Fungal evolutionary genomics provides insight  
539 into the mechanisms of adaptive divergence in eukaryotes. *Mol. Ecol.* 23: 753–773.
- 540 Gaunt, T. R., Rodríguez, S., Day, I. N. 2007. Cubic exact solutions for the estimation of pairwise  
541 haplotype frequencies: implications for linkage disequilibrium analyses and a web tool  
542 “CubeX.” *BMC Bioinformatics* 8: 428.
- 543 Grünwald, N. J., McDonald, B. A., Milgroom, M. G. 2016. Population Genomics of Fungal and  
544 Oomycete Pathogens. *Annu. Rev. Phytopathol.* 54: 323–346.
- 545 Hijmans, R. J., Cameron, S. E., Parra, J. L., Jones, P. G., Jarvis, A. 2005. Very high resolution  
546 interpolated climate surfaces for global land areas. *Int. J. Climatol.* 25: 1965–1978.
- 547 Høistad, F., Gjerde, I. 2011. *Lobaria pulmonaria* can produce mature ascospores at an age of less  
548 than 15 years. *Lichenologist* 43: 495–497.
- 549 Itten, B., Honegger, R. 2010. Population genetics in the homothallic lichen-forming  
550 ascomycete *Xanthoria parietina*. *Lichenologist* 42: 751–761.
- 551 Jombart, T. 2008. adegenet: a R package for the multivariate analysis of genetic  
552 markers. *Bioinformatics* 24: 1403–1405.



- 553 Jombart, T., Devillard, S., Balloux, F. 2010. Discriminant analysis of principal components: a  
554 new method for the analysis of genetically structured populations. *BMC Genetics* 11: 94.
- 555 Kamvar, Z. N., Tabima, J. F., Grünwald, N. J. 2014. Poppr: an R package for genetic analysis of  
556 populations with clonal, partially clonal, and/or sexual reproduction. *PeerJ* 2: e281.
- 557 Keith, R., Hedin, M. 2012. Extreme mitochondrial population subdivision in southern  
558 Appalachian paleoendemic spiders (Araneae: Hypochilidae: *Hypochilus*), with  
559 implications for species delimitation. *J. Arachnol.* 40: 167–181.
- 560 Korf, I. 2004. Gene finding in novel genomes. *BMC Bioinformatics* 5:59
- 561 Kumar, S., Jones, M., Koutsovoulos, G., Clarke, M., Blaxter, M. 2013. Blobology: exploring raw  
562 genome data for contaminants, symbionts and parasites using taxon-annotated GC-  
563 coverage plots. *Front. Genet.* 4: 237.
- 564 Leducq, J.-B., Nielly-Thibault, L., Charron, G. *et al.* 2016. Speciation driven by hybridization  
565 and chromosomal plasticity in a wild yeast. *Nat. Microbiol.* 1: 15003.
- 566 Lee, S. C., Ni, M., Li, W., Shertz, C., Heitman, J. 2010. The evolution of sex: a perspective from  
567 the fungal kingdom. *Microbiol. Mol. Biol. Rev.* 74: 298–340.
- 568 Li, H., Durbin, R. 2009. Fast and accurate short read alignment with Burrows–Wheeler  
569 transform. *Bioinformatics* 25: 1754–1760.
- 570 Linde, C. C., Zala, M., Ceccarelli, S., McDonald, B. A. 2003. Further evidence for sexual  
571 reproduction in *Rhynchosporium secalis* based on distribution and frequency of mating-  
572 type alleles. *Fungal Genet. Biol.* 40: 115–125.
- 573 Lindgren, H., Leavitt, S. D., Lumbsch, T. 2016. Characterization of microsatellite markers in the  
574 cosmopolitan lichen-forming fungus *Rhizoplaca*  
575 *melanophthalma*(Lecanoraceae). *MycKeys*, 14: 31–36.

- 576 Liti, G., Carter, D. M., Moses, A. M. *et al.* (2009) Population genomics of domestic and wild  
577 yeasts. *Nature* 458: 337–341.
- 578 Lücking, R., Hodkinson, B. P., Leavitt, S. D. 2016. The 2016 classification of lichenized fungi in  
579 the Ascomycota and Basidiomycota – Approaching one thousand genera. *Bryologist* 119:  
580 361–416.
- 581 Lutsak, T., Fernández-Mendoza, F., Greshake, B. *et al.* 2016. Characterization of microsatellite  
582 loci in the lichen-forming fungus *Cetraria aculeata* (Parmeliaceae, Ascomycota). *Appl.*  
583 *Plant Sci.* 4: 1600047.
- 584 Magain, N., Forrest, L. L., Sérusiaux, E., Goffinet, B. 2010. Microsatellite primers in  
585 the *Peltigera dolichorhiza* complex (lichenized ascomycete, Peltigerales). *American*  
586 *Journal of Botany*, **97**, e102–4.
- 587 Magoč, T., Salzberg, S. L. 2011. FLASH: fast length adjustment of short reads to improve  
588 genome assemblies. *Bioinformatics* 27: 2957–2963.
- 589 Manos, P. S., Meireles, J. E. 2015. Biogeographic analysis of the woody plants of the Southern  
590 Appalachians: Implications for the origins of a regional flora. *Am. J. Bot.* 102: 780–804.
- 591 Martin, M. 2011. Cutadapt removes adapter sequences from high-throughput sequencing  
592 reads. *EMBnet.journal* 17: 10–12.
- 593 McDonald, T. R., Mueller, O., Dietrich, F. S., Lutzoni, F. 2013. High-throughput genome  
594 sequencing of lichenizing fungi to assess gene loss in the ammonium  
595 transporter/ammonia permease gene family. *BMC Genomics* 14: 225.
- 596 Muscarella, R., Galante, P. J., Soley-Guardia, M. *et al.* 2014. ENMeval: An R package for  
597 conducting spatially independent evaluations and estimating optimal model complexity  
598 for Maxent ecological niche models. *Methods Ecol. Evol.* 5: 1198–1205.

- 599 Nadyeina, O., Dymytrava, L., Naumovych, A. *et al.* 2014. Microclimatic differentiation of gene  
600 pools in the *Lobaria pulmonaria* symbiosis in a primeval forest landscape. *Mol. Ecol.* 23:  
601 5164–5178.
- 602 Nadyeina, O., Cornejo, C., Boluda, C. G. *et al.* 2014. Characterization of microsatellite loci in  
603 lichen-forming fungi of *Bryoria* section *Implexae* (Parmeliaceae). *Appl. Plant Sci.* 2:  
604 1400037.
- 605 O'Malley, M. A. 2007. The nineteenth century roots of “everything is everywhere.” *Nat. Rev.*  
606 *Microbiol.* 5: 647–651.
- 607 Ohm, R. A., Feau, N., Henrissat, B. *et al.* 2012. Diverse lifestyles and strategies of plant  
608 pathogenesis encoded in the genomes of eighteen Dothideomycetes fungi. *PLoS*  
609 *Pathog.* 8: e1003037.
- 610 Paoletti, M., Seymour, F. A., Alcocer, M. J. C. *et al.* 2007. Mating type and the genetic basis of  
611 self-fertility in the model fungus *Aspergillus nidulans*. *Curr. Biol.* 17: 1384–1389.
- 612 Papadopoulos, J. S., Agarwala, R. 2007. COBALT: constraint-based alignment tool for multiple  
613 protein sequences. *Bioinformatics* 23. 1073–1079.
- 614 Paradis, E., Claude, J., Strimmer, K. 2004. APE: Analyses of Phylogenetics and Evolution in R  
615 language. *Bioinformatics* 20: 289–290.
- 616 Park, S.-Y., Choi, J., Kim, J. A. *et al.* 2013. Draft Genome Sequence of *Cladonia*  
617 *macilenta* KoLRI003786, a Lichen-Forming Fungus Producing Biruloquinone. *Genome*  
618 *Announc.* 1: e00695-13
- 619 Parra, G., Bradnam, K., Korf, I. 2007. CEGMA: a pipeline to accurately annotate core genes in  
620 eukaryotic genomes. *Bioinformatics* 23: 1061–1067.

- 621 Peter, J., Schacherer, J. 2016. Population genomics of yeasts: towards a comprehensive view  
622 across a broad evolutionary scale. *Yeast* 33: 73–81.
- 623 Phillips, S. J., Dudík, M., Schapire, R. E. 2004. A Maximum Entropy Approach to Species  
624 Distribution Modeling. *Proceedings of the Twenty-First International Conference on*  
625 *Machine Learning*. 655–662.
- 626 Phillips, S. J., Anderson, R. P., Schapire, R. E. 2006. Maximum entropy modeling of species  
627 geographic distributions. *Ecol. Modell.* 190: 231–259.
- 628 Premoli, A. C., del Castillo, R. F., Newton, A. C. *et al.* 2007. Patterns of Genetic Variation in  
629 Tree Species and their Implications for Conservation. In: *Biodiversity Loss and*  
630 *Conservation in Fragmented Forest Landscapes: the Forests of Montane Mexico and*  
631 *Temperate South America*. AC Newton, Ed. CABI, Wallingford, UK.
- 632 Scherrer, S., Zippler, U., Honegger, R. 2005. Characterisation of the mating-type locus in the  
633 genus *Xanthoria* (lichen-forming ascomycetes, Lecanoromycetes). *Fungal Genet.*  
634 *Biol.* 42: 976–988.
- 635 Schoch, C. L., Sung, G.-H., López-Giráldez, F. *et al.* 2009. The Ascomycota tree of life: a  
636 phylum-wide phylogeny clarifies the origin and evolution of fundamental reproductive  
637 and ecological traits. *Syst. Biol.* 58: 224–239.
- 638 Scheglovitova, M., Anderson, R. P. 2013. Estimating optimal complexity for ecological niche  
639 models: A jackknife approach for species with small sample sizes. *Ecol. Modell.* 269: 9–  
640 17.
- 641 Seymour, F. A., Crittenden, P. D., Dickinson, M. J. *et al.* 2005. Breeding systems in the lichen-  
642 forming fungal genus *Cladonia*. *Fungal Genet. Biol.* 42: 554–563.

- 643 Simpson, J. T., Wong, K., Jackman, S. D. *et al.* 2009 ABySS: a parallel assembler for short read  
644 sequence data. *Genome Res.* 19: 1117–1123.
- 645 Singh, G., Dal Grande, F., Cornejo, C., Schmitt, I., Scheidegger, C. 2012. Genetic basis of self-  
646 incompatibility in the lichen-forming fungus *Lobaria pulmonaria* and skewed frequency  
647 distribution of mating-type idiomorphs: implications for conservation. *PloS one* 7:  
648 e51402.
- 649 Singh, G., Ashby, A. M. 1998. Cloning of the mating type loci  
650 from *Pyrenopeziza brassicae* reveals the presence of a novel mating type gene within a  
651 discomycete MAT 1-2 locus encoding a putative metallothionein-like protein. *Mol.*  
652 *Microbiol.* 30: 799–806.
- 653 Spielman, D., Brook, B. W., Briscoe, D. A., Frankham, R. 2004. Does inbreeding and loss of  
654 genetic diversity decrease disease resistance? *Conserv. Genet.* 5: 439–448.
- 655 Stefanini, I., Dapporto, L., Berná, L. *et al.* 2016. Social wasps are a *Saccharomyces* mating  
656 nest. *Proc. Natl. Acad. Sci. USA* 113: 2247–2251.
- 657 Taylor, J. W., Hann-Soden, C., Branco, S., Sylvain, I., Ellison, C. E. 2015. Clonal reproduction  
658 in fungi. *Proc. Natl. Acad. Sci. USA* 112: 8901–8908.
- 659 Tsai, I. J., Bensasson, D., Burt, A., Koufopanou, V. 2008. Population genomics of the wild  
660 yeast *Saccharomyces paradoxus*: Quantifying the life cycle. *Proc. Natl. Acad. Sci.*  
661 *USA* 105: 4957–4962.
- 662 United States Fish and Wildlife Service (USFWS) (2013) *Rock Gnome Lichen (Gymnoderma*  
663 *lineare) 5-year Review: Summary and Evaluation.* USFWS.

- 664 Waalwijk, C., Mendes, O., Verstappen, E. C. P., de Waard, M. A., Kema, G. H. J. 2002.  
665 Isolation and characterization of the mating-type idiomorphs from the wheat septoria leaf  
666 blotch fungus *Mycosphaerella graminicola*. *Fungal Genet Biol.* 35: 277–286.
- 667 Warren, D. L., Seifert, S. N. 2011. Ecological niche modeling in Maxent: the importance of  
668 model complexity and the performance of model selection criteria. *Ecol. Appl.* 21: 335–  
669 342.
- 670 Wei, J., Ahti, T. 2002. *Cetradonia*, a New Genus in the New Family Cetradoniaceae  
671 (Lecanorales, Ascomycota). *Lichenologist* 34: 19–31.
- 672 Werth, S., Wagner, H. H., Holderegger, R., Kalwij, J. M., Scheidegger, C. 2006. Effect of  
673 disturbances on the genetic diversity of an old-forest associated lichen. *Molecular*  
674 *Ecology*, **15**, 911–921.
- 675 Widmer, I., Dal Grande, F., Cornejo, C., Scheidegger, C. 2010. Highly variable microsatellite  
676 markers for the fungal and algal symbionts of the lichen *Lobaria pulmonaria* and  
677 challenges in developing biont-specific molecular markers for fungal  
678 associations. *Fungal Biol.* 114: 538–544.
- 679 Wilson, A. M., Wilken, P. M., van der Nest, M. A. *et al.* 2015. Homothallism: an umbrella term  
680 for describing diverse sexual behaviours. *IMA fungus* 6: 207–214.
- 681 Wyss, T., Masclaux, F. G., Rosikiewicz, P., Pagni, M., Sanders, I. R. 2016. Population genomics  
682 reveals that within-fungus polymorphism is common and maintained in populations of  
683 the mycorrhizal fungus *Rhizophagus irregularis*. *ISME J.* 10: 2514–2526.
- 684 Zhou, Q.-M., Wei, J.-C., Ahti, T., Stenroos, S., Högnabba, F. 2006. The systematic position  
685 of *Gymnoderma* and *Cetradonia* based on SSU rDNA sequences. *J. Hattori Bot.*  
686 *Lab.*100: 871–880.

687 **Table 1.** Site names, mountain range, individuals sampled, average percent SNPs covered for  
688 each site/mountain range (% Cov), and average nucleotide diversity for all sampled sites and  
689 mountain ranges.

| <b>Mtn. Range</b> | <b># Ind.</b> | <b>% Cov</b> | <b><math>\pi</math></b> |
|-------------------|---------------|--------------|-------------------------|
| Smokies           | 5             | 58.1         | 0.338                   |
| Nantahalas        | 12            | 52.6         | 0.329                   |
| Blacks            | 6             | 98.6         | 0.268                   |
| Balsams           | 4             | 71.9         | 0.208                   |
| Roan              | 3             | 64.4         | 0.148                   |
| All               | 32            | 66           | 0.328                   |

690

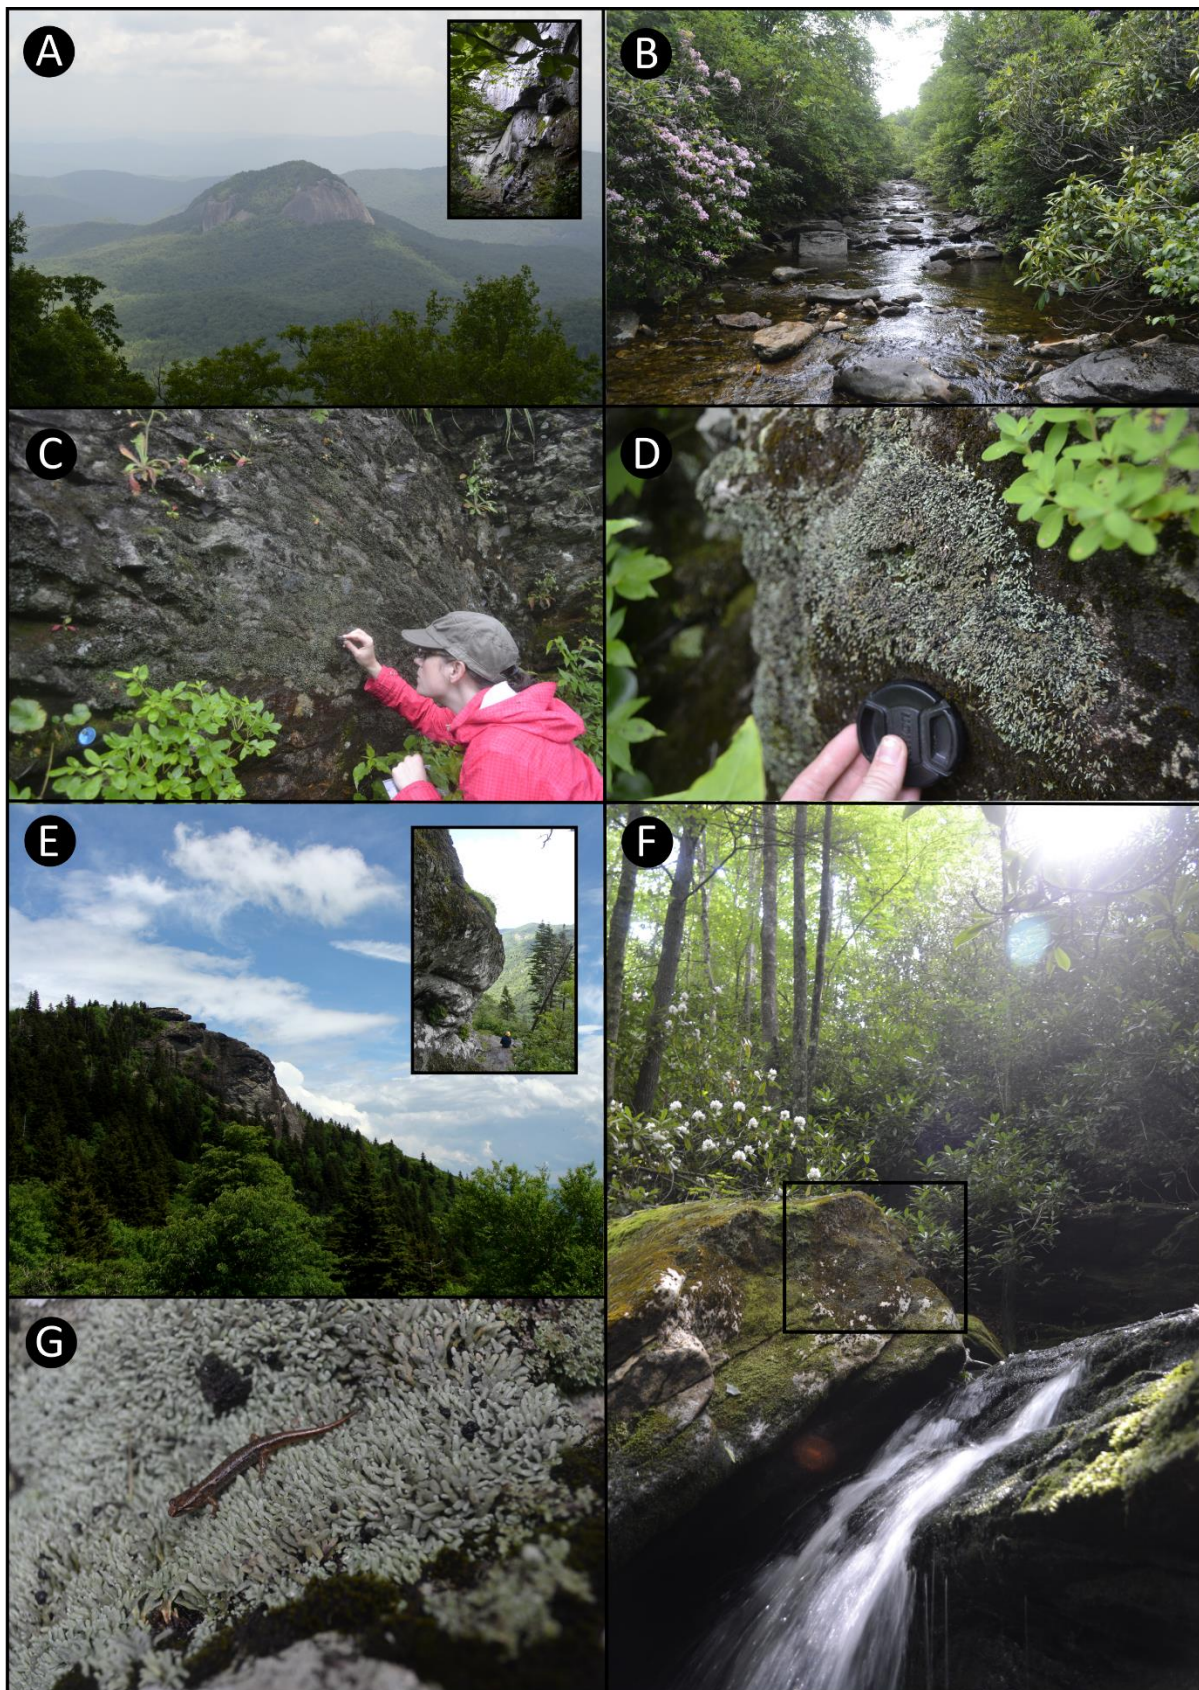



692 **Figure 1.** Morphology, habit, and habitat of *Cetradonia linearis*. A) Large granite dome where  
693 species occurs at base of large rock faces, inset shows seeping rock faces where the species  
694 occurs; B) Stream habitat where species occurs frequently on scattered rocks and boulders  
695 throughout; C) Large boulder face covered in the species illustrating sampling protocol using  
696 sterile forceps; D) Fertile colony on mossy boulder in stream; E) Large rock outcrop hosting  
697 colonies of the species, inset shows view from *Cetradonia linearis* perspective; F) Waterfall  
698 populations are very abundant, one colony outlined by black box; G) Colony displaying  
699 apothecium and potential zoochory event.

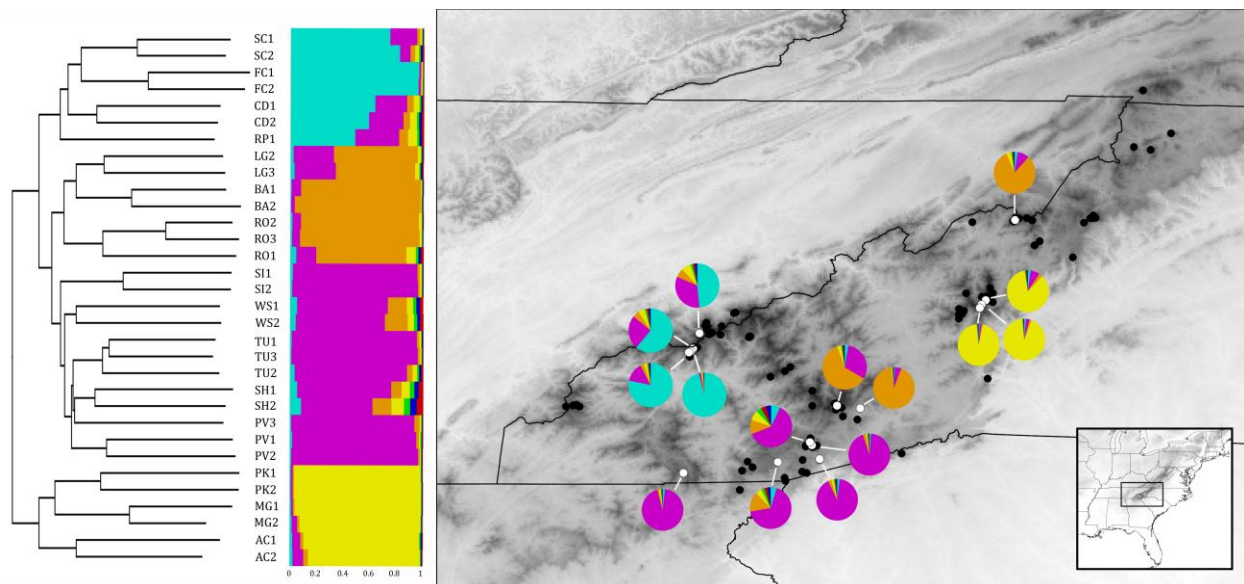

700

701 **Figure 2.** Population structure of *Cetradonia linearis*. Left: Neighbor-joining tree showing  
702 hierarchical clustering of all sampled individuals. Middle: Proportional cluster belonging of each  
703 individual sampled as inferred by InStruct. Right: Distribution of *C. linearis* and average  
704 proportional cluster belonging for each sampling site.

705

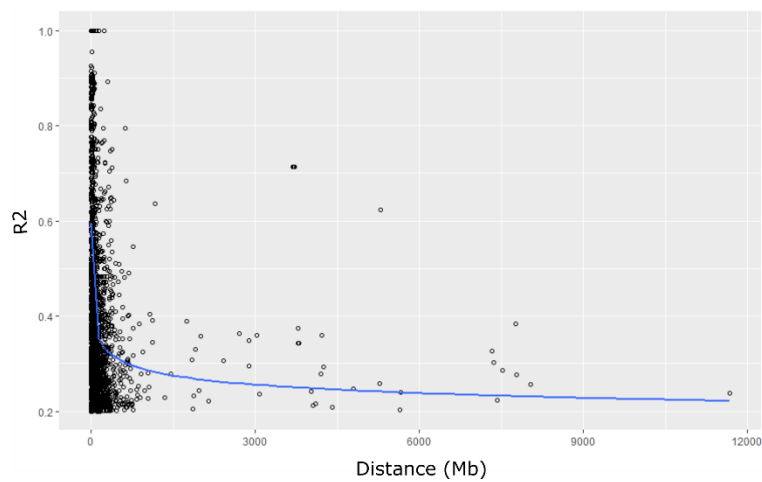

706

707 **Figure 3.** Linkage decay plot for *Cetradonia linearis*.

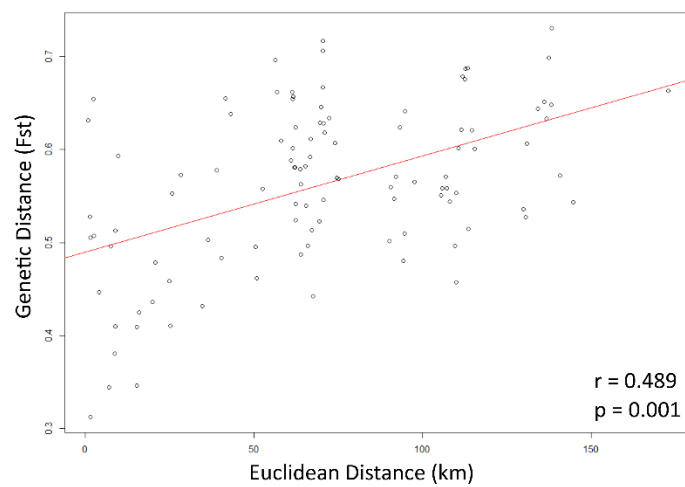

708

709 **Figure 4.** Scatterplot of genetic vs. geographic distance and outcome of statically significant  
710 partial Mantel test.

711

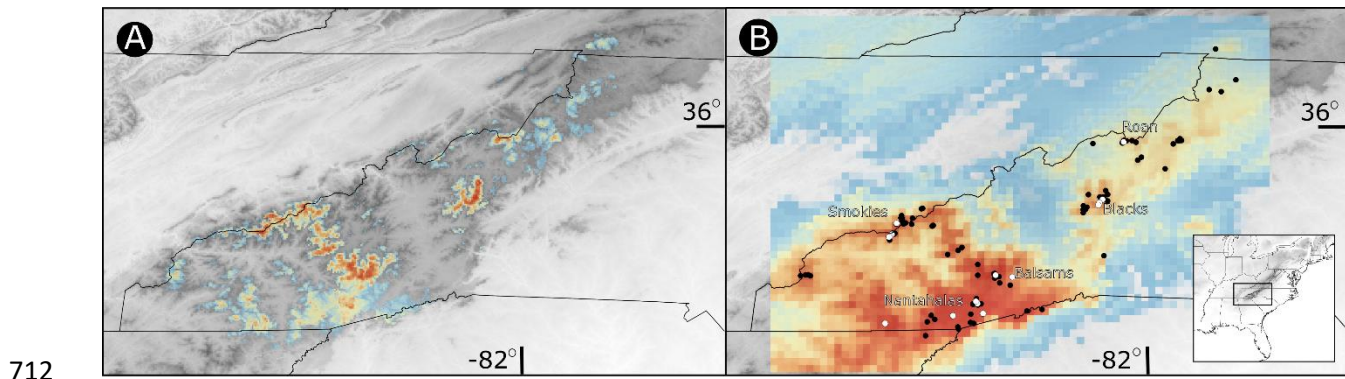

**Figure 5.** Species distribution model of *Cetradonia linearis* A) in the present; B) at the last glacial maximum. Probability of *C. linearis* grades from blue (low) to red (high). Inset gives larger spatial orientation of study area.
